# Supplementary material for: Transcriptomic profiling of immune cells in murine polymicrobial sepsis
Source: Frontiers journal article supplement (doi:10.3389/fimmu.2024.1347453), 2024-01-26
Supplement: Data_Sheet_1.PDF [file Data_Sheet_1.PDF]

**Supplemental Figure 1. Quality control metrics.**

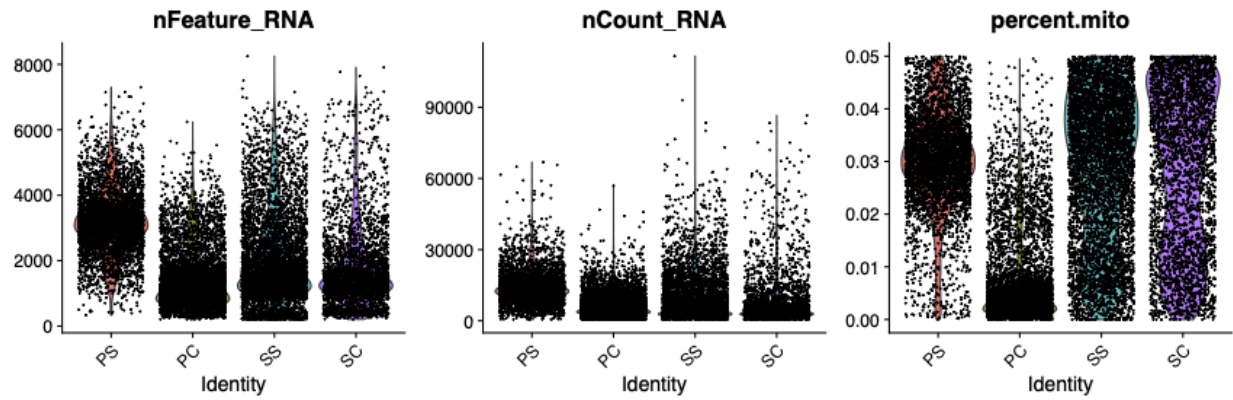

Plots showing the number of genes detected in each cell (nFeature\_RNA), the number of molecules detected in each cell (nCount\_RNA), and percent mitochondrial genes (percent.mito) after using DoubletFinder and applying cutoffs. PS, peritoneal cavity sham; PC, peritoneal cavity CLP; SS, spleen sham; SC, spleen CLP.

Supplemental Figure 2. Non-harmonized clusters.

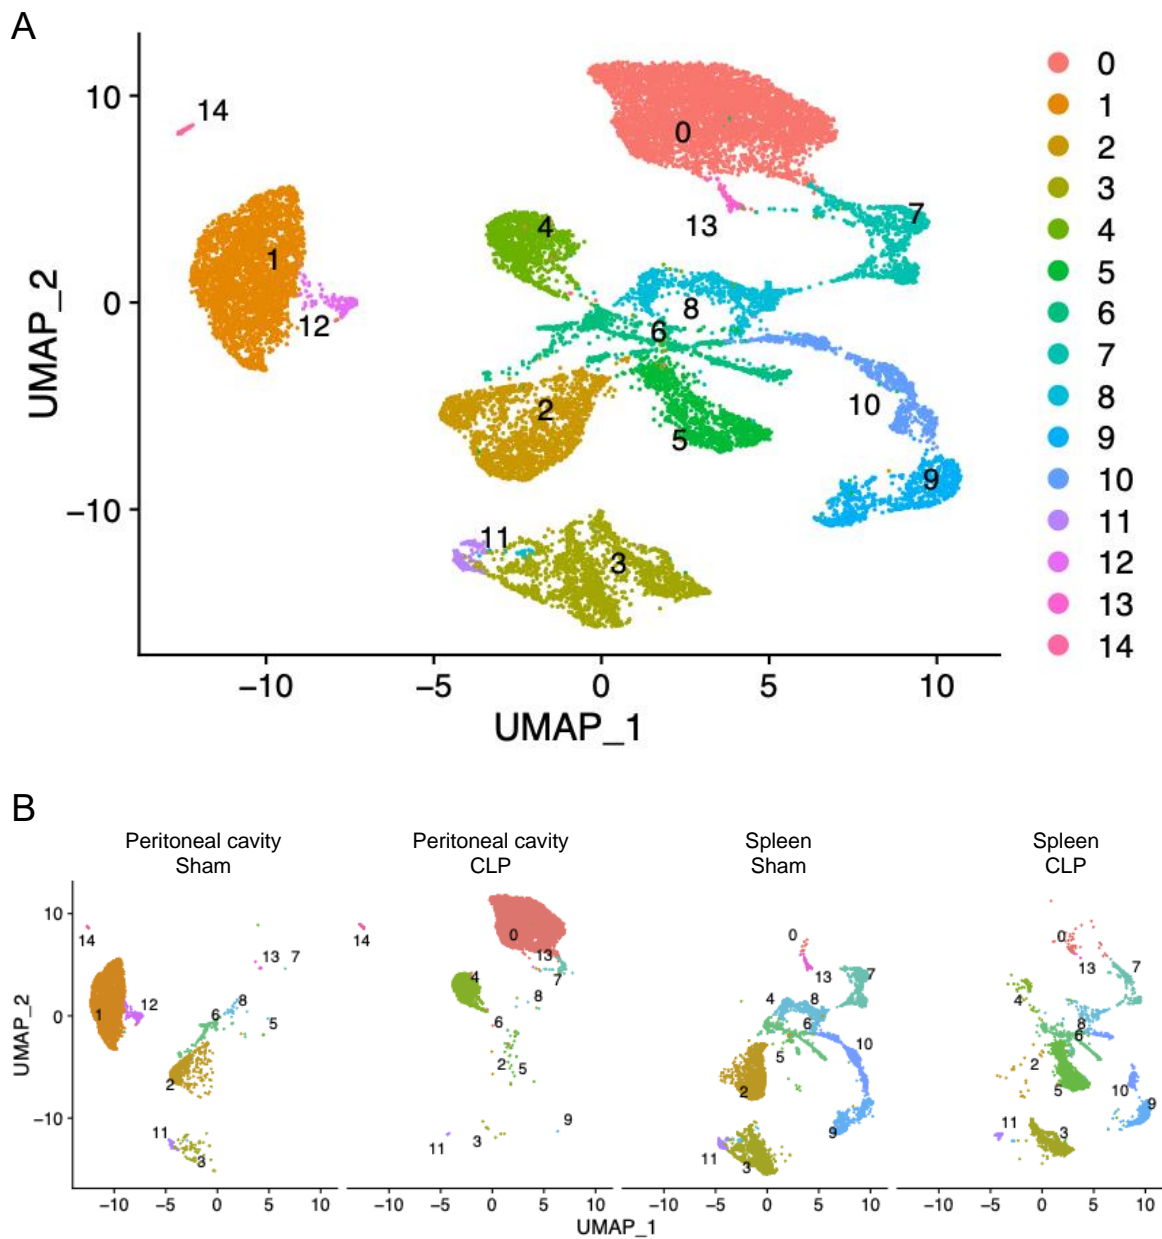

Non-harmonized UMAP plots for (A) all groups combined and (B) each group.

Supplemental Figure 3. Top expressed genes for all clusters.

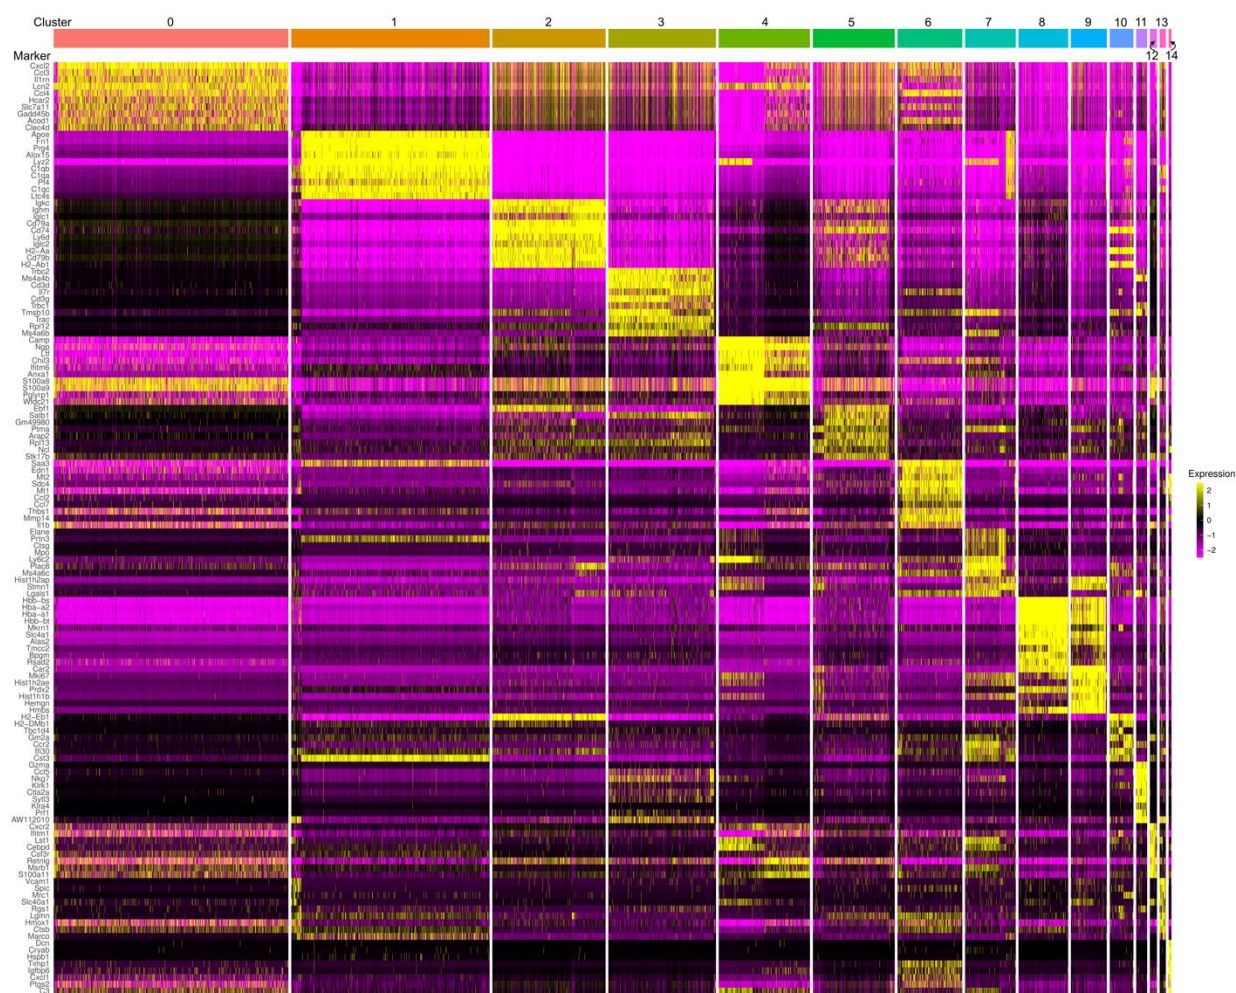

A heatmap showing the top expressed genes for all 14 clusters.

**Supplemental Figure 4. Additional markers for identifying cell types.**

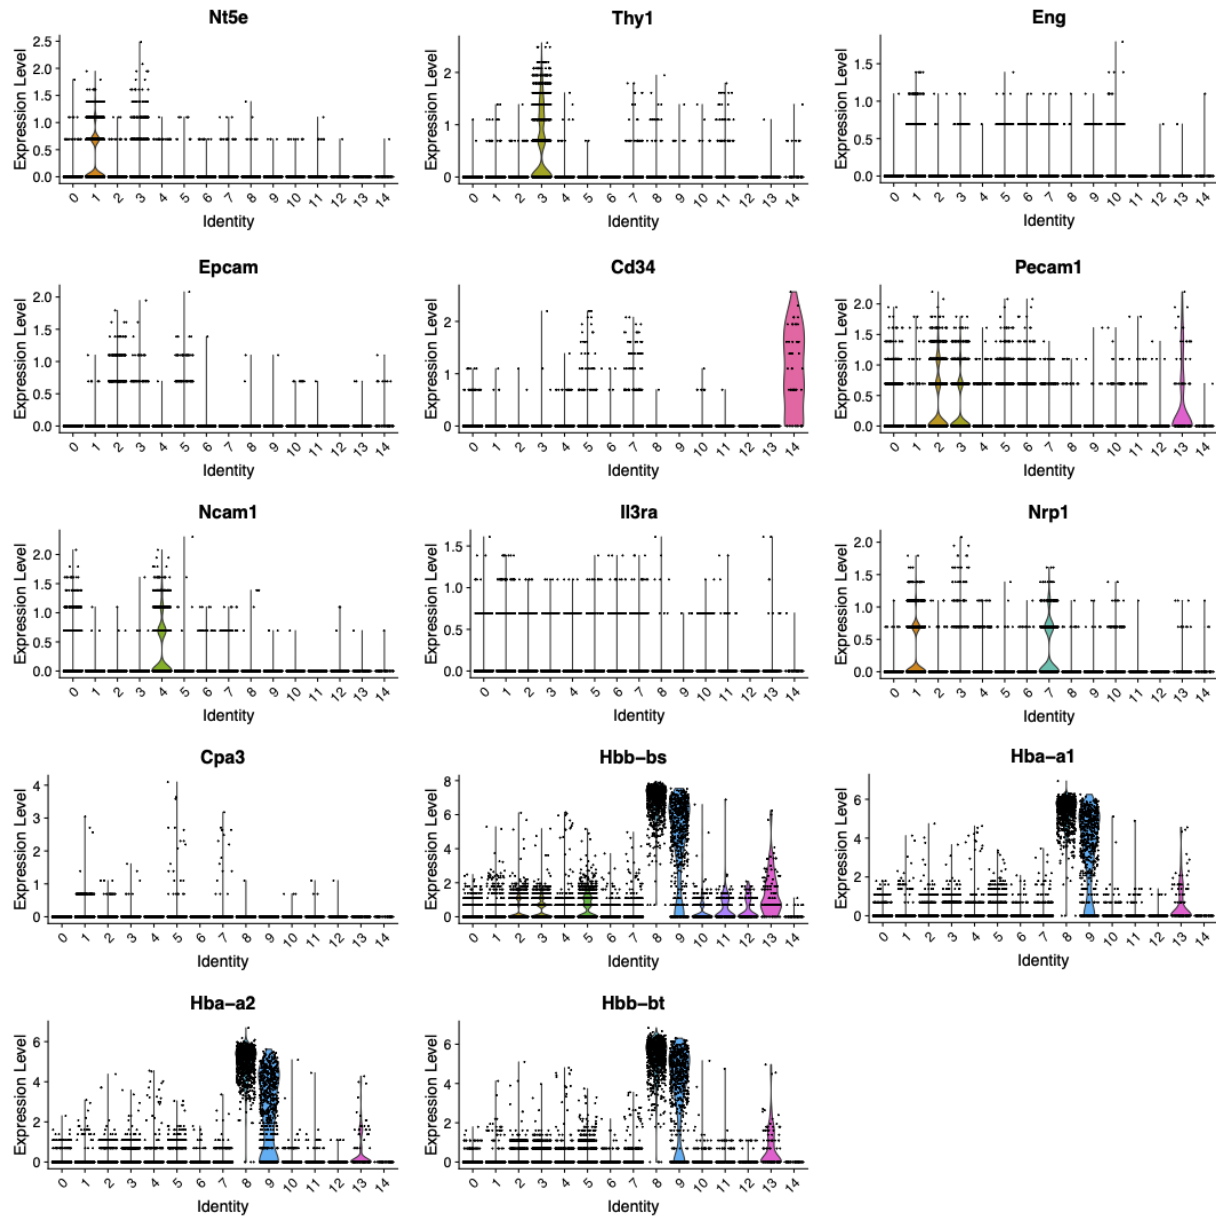

Violin plots of key markers for stromal cells (Nt5e, Thy1, Eng), epithelial cells (Epcam), endothelial-related cells (Cd34, Pecam1), natural killer cells (Ncam1), plasmacytoid dendritic cells (Il3ra, Nrp1), granulocytes (Cpa3), and erythroid cells (Hbb-bs, Hba-a2, Hba-a1, Hbb-bt).

**Supplemental Figure 5. Initial annotations for all clusters.**

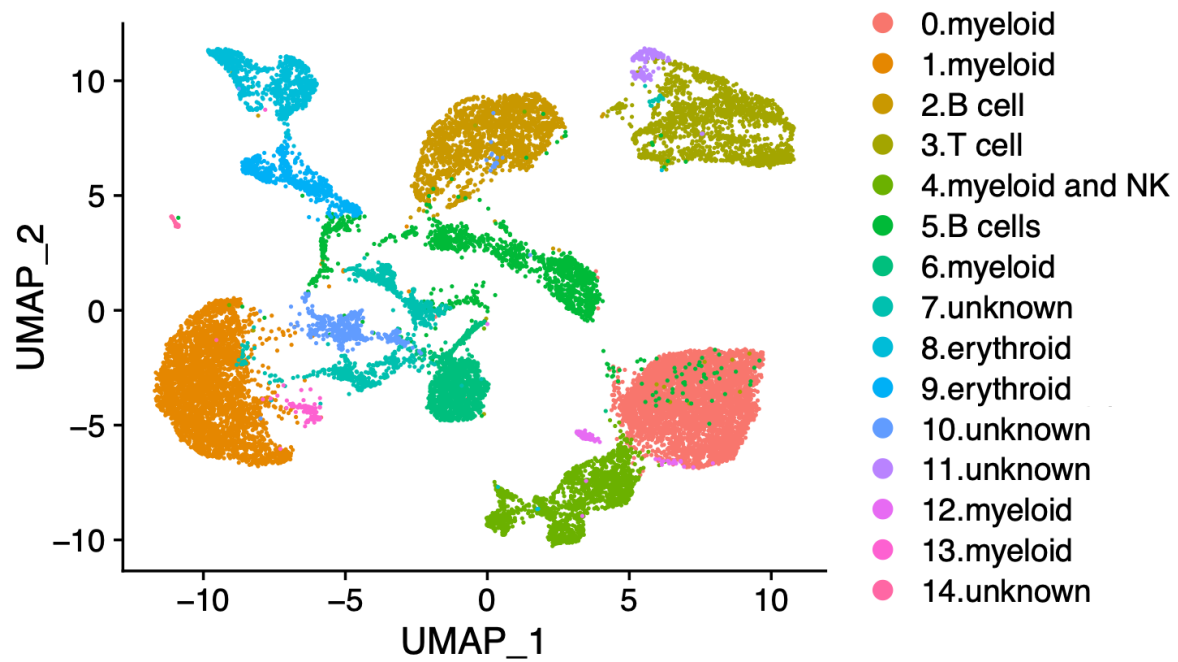

UMAP plots (all samples combined) with initial annotations for all clusters.

**Supplemental Figure 6. Markers for B-1 and B-2 cells.**

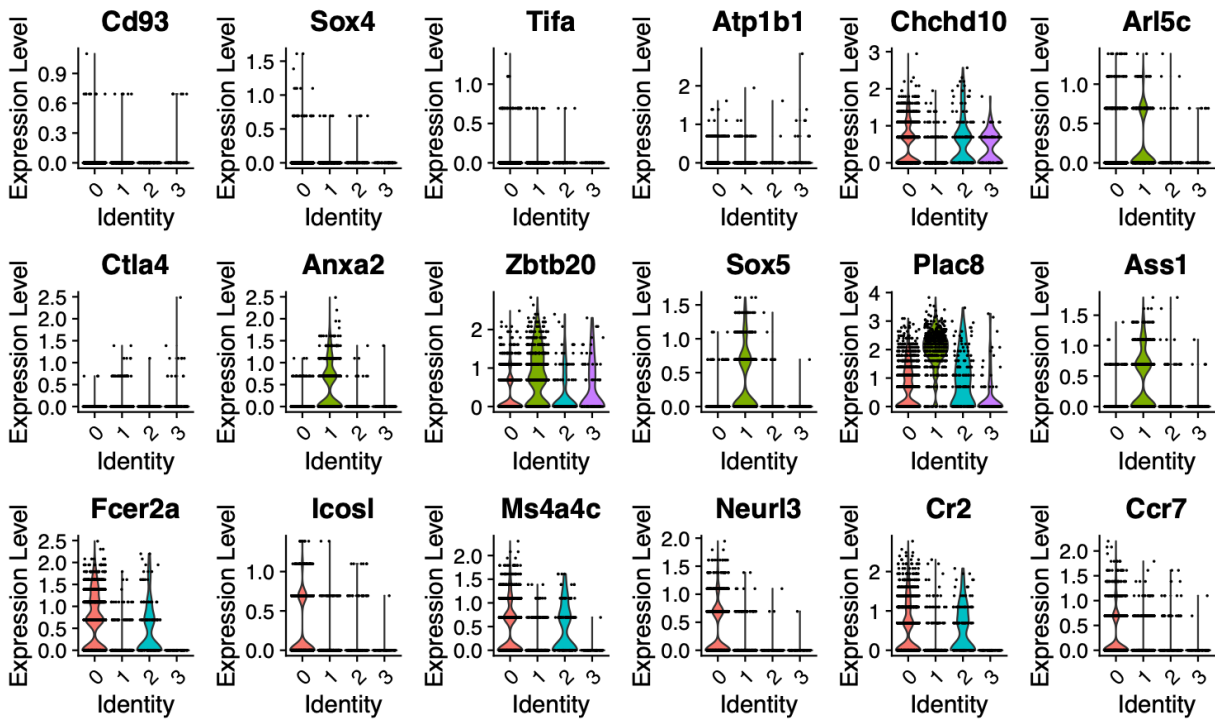

Violin plots of key markers used for identifying B-1 (cluster#1) and B-2 (cluster#0, #2) cells.
